# Supplementary material
Source: ML conference proceedings conference paper supplement (https://openaccess.thecvf.com/content/CVPR2023/html/Garg_Samples_With_Low_CVPR_2023_paper.html)
Supplement: Supplementary file 1 [file Garg_Samples_With_Low_CVPR_2023_supplemental.pdf]

# Samples with Low Loss Curvature Improve Data Efficiency - Supplementary

Isha Garg  
Purdue University  
West Lafayette, USA  
gargi@purdue.edu

Kaushik Roy  
Purdue University  
West Lafayette, USA  
kaushik@purdue.edu

## A. Curvature Histograms and Corresponding Images for More Datasets and Networks

### A.1. CIFAR-100

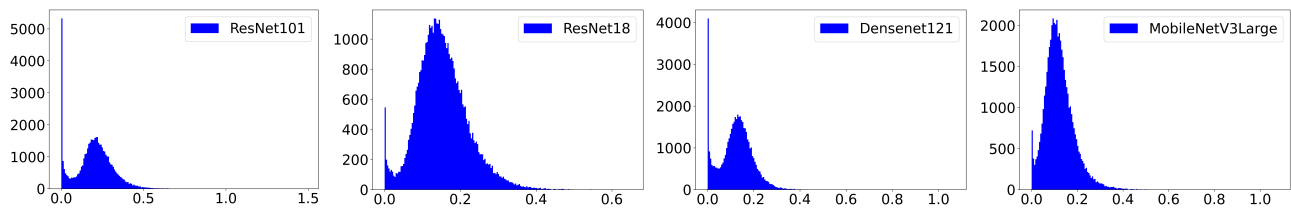

Figure 1. Curvature histograms for training set of CIFAR-100 for different trained networks. The same training hyperparameters were used as for CIFAR-10, mentioned in section 4.1 of the main text.

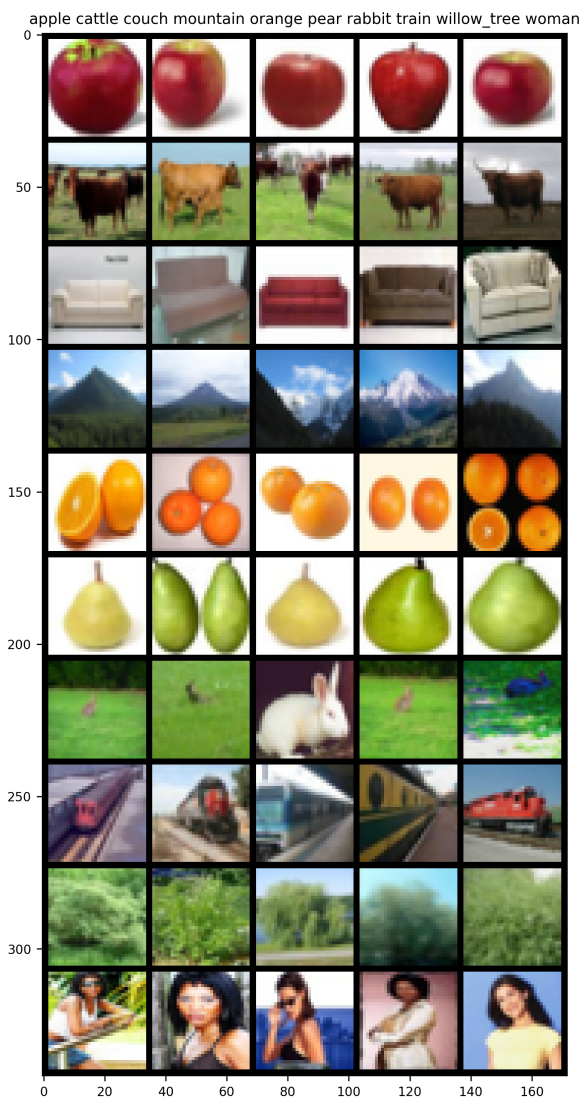

(a) Top 50 examples with the lowest loss curvature on CIFAR100

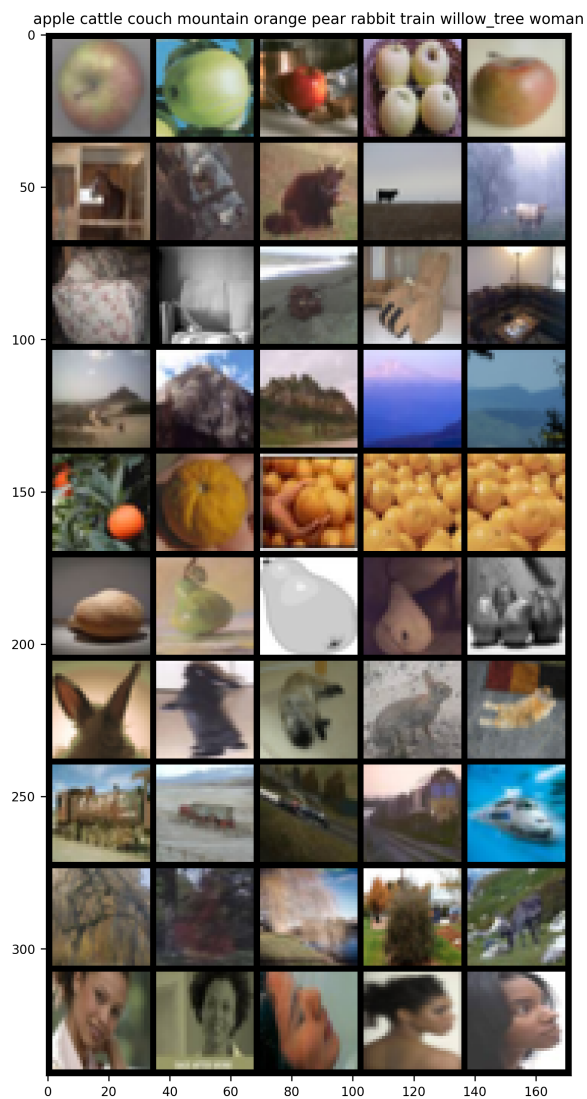

(b) Top 50 examples with the highest loss curvature on CIFAR100

Figure 2. Samples from 10 randomly chosen classes with lowest and highest curvature of loss identified over 3 different randomly initialized ResNet18 models trained on CIFAR-100. Each row corresponds to a class, consistent across both figures, and five ordered samples for each class are shown. The classes are apple, cattle, couch, mountain, orange, pear, rabbit, train, willow-tree and woman.

## A.2. ImageNet

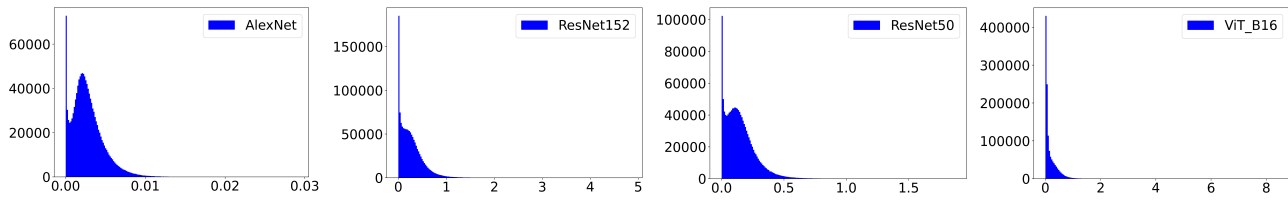

Figure 3. Curvature histograms for training set of ImageNet for different trained networks. The pretrained weights were selected from torchvision [?], and we selected the V1 weights for all models.

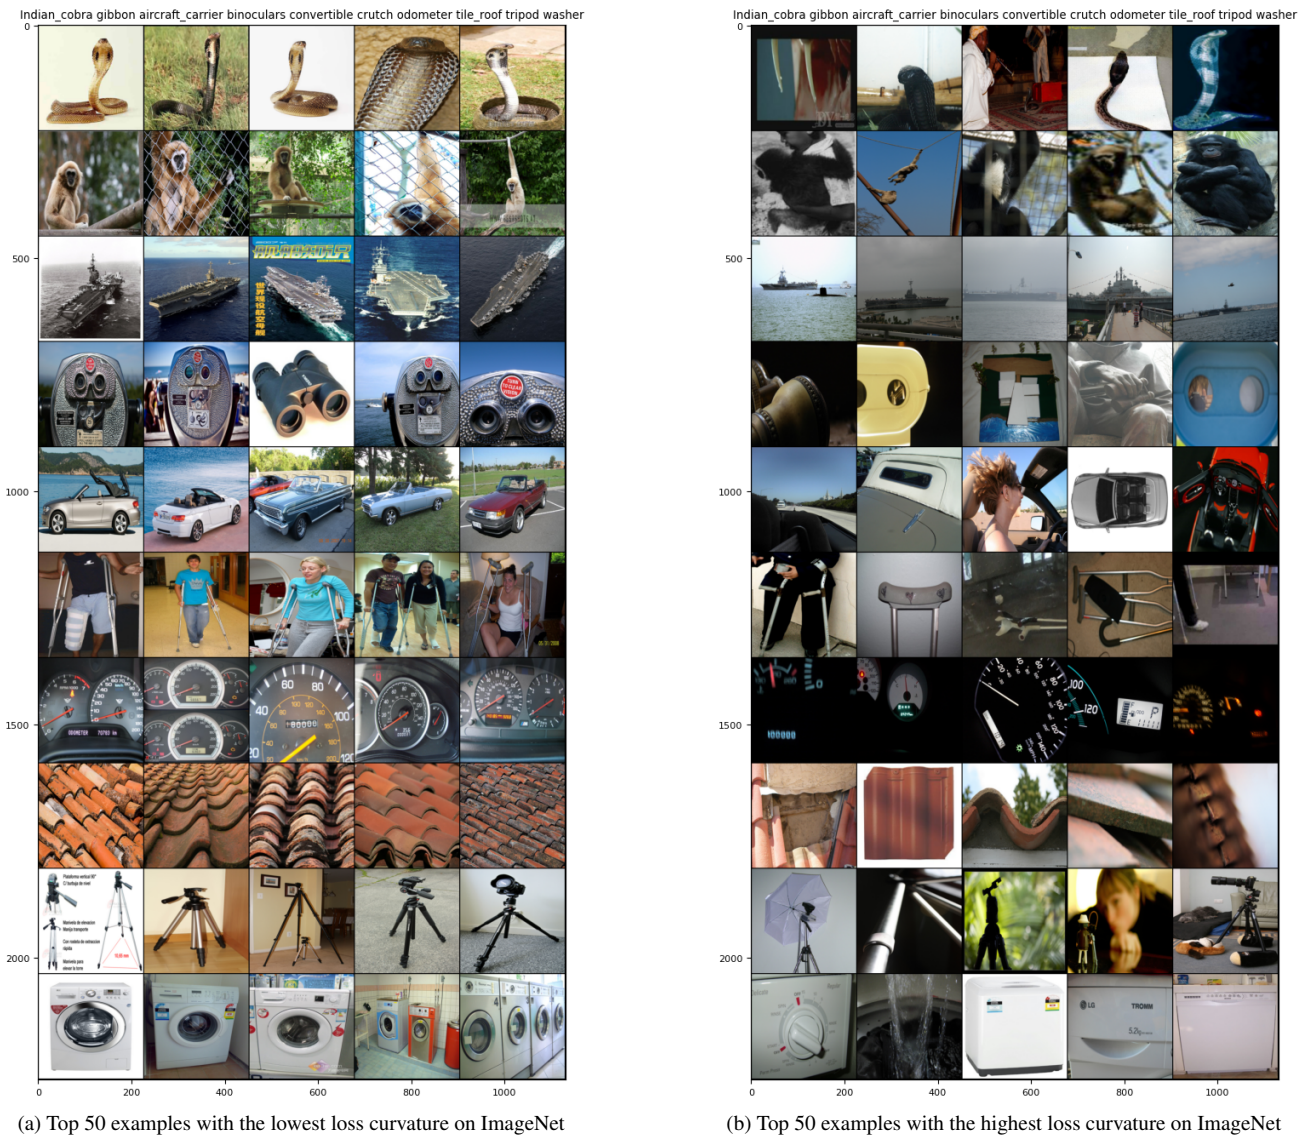

Figure 4. Samples from 10 randomly chosen classes with lowest and highest curvature of loss identified over 4 different ResNet models of different sizes: ResNet18, ResNet50, ResNet101, ResNet152 trained on ImageNet. Each row corresponds to a class, consistent across both figures, and 5 ordered samples for each class are shown. The network was trained with standard random rescaled crops for augmentation, which was turned off to visualize these images. The classes are indian-cobra, gibbon, aircraft-carrier, binoculars, convertible, crutch, odometer, tile-roof, tripod and washer.

### A.3. Overlap of Samples Across Architectures

Here, we show the histograms of curvature accumulated over different pretrained networks to show that these networks share many low curvature samples in common. The method for collecting these is described in Section 3.2 of the main text.

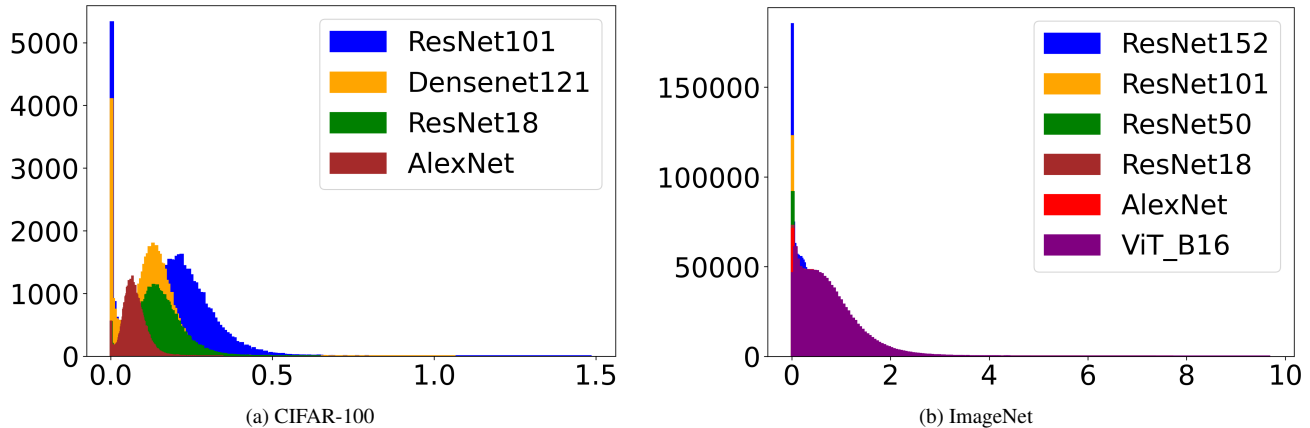

Figure 5. Cross architecture results to show commonality of low curvature samples across different architectures.

## B. Mean and Variance Tables

In this section, we tabulate the results shown graphically in Section 4 of the main text. These numbers refer to the mean and variance of 5 randomly seeded runs.

### B.1. CIFAR10: Comparison with Other Coreset Selection Methods

Table 1. Table corresponding to Figure 5a), Section 4.2 of main text.

| NImPerC | Random     | Cal               | GraphCut          | Glister    | Grand      | Forgetting | Herdling   | CRAIG      | Margin     | SLo-Curves        |
|---------|------------|-------------------|-------------------|------------|------------|------------|------------|------------|------------|-------------------|
| 1       | 14.97 ±1.2 | 15.75 ±2.1        | 15.92 ±3.2        | 14.09 ±2.0 | 14.58 ±2.1 | 13.91 ±1.7 | 15.47 ±1.8 | 17.25 ±1.2 | 15.27 ±1.7 | <b>18.54 ±1.7</b> |
| 2       | 16.6 ±0.7  | 20.48 ±2.2        | 18.46 ±1.3        | 16.37 ±2.3 | 16.14 ±1.6 | 15.72 ±1.1 | 16.42 ±1.3 | 17.23 ±1.7 | 15.0 ±1.9  | <b>21.45 ±1.1</b> |
| 3       | 20.38 ±1.9 | 21.43 ±2.4        | 21.17 ±1.6        | 18.28 ±2.0 | 16.94 ±1.7 | 18.58 ±1.8 | 20.22 ±2.4 | 19.18 ±1.0 | 17.73 ±1.7 | <b>22.35 ±0.6</b> |
| 4       | 19.46 ±0.7 | 22.08 ±1.8        | 23.02 ±1.9        | 19.99 ±2.3 | 18.46 ±1.0 | 17.61 ±2.0 | 19.91 ±2.3 | 20.11 ±2.0 | 18.05 ±2.0 | <b>23.35 ±1.3</b> |
| 5       | 20.17 ±0.6 | 24.4 ±0.6         | 22.6 ±1.0         | 20.44 ±1.4 | 18.97 ±1.1 | 21.72 ±1.7 | 18.5 ±2.4  | 24.3 ±2.8  | 18.67 ±1.2 | <b>25.69 ±1.7</b> |
| 6       | 22.94 ±1.0 | 23.71 ±2.3        | 22.73 ±1.1        | 22.52 ±1.4 | 20.48 ±2.1 | 20.26 ±1.1 | 20.44 ±2.3 | 23.24 ±2.3 | 19.1 ±2.1  | <b>25.86 ±0.3</b> |
| 7       | 26.31 ±1.0 | <b>27.02 ±1.1</b> | 24.53 ±1.8        | 22.08 ±1.1 | 19.78 ±1.0 | 21.74 ±1.4 | 22.11 ±3.5 | 21.84 ±1.7 | 19.31 ±1.0 | 27.01 ±1.2        |
| 8       | 23.8 ±0.7  | 26.3 ±1.7         | 27.89 ±2.3        | 22.03 ±1.1 | 20.9 ±2.0  | 21.11 ±0.9 | 22.81 ±1.6 | 24.21 ±2.5 | 20.1 ±0.6  | <b>28.58 ±1.3</b> |
| 9       | 23.88 ±0.5 | 26.69 ±2.0        | <b>28.88 ±1.4</b> | 22.47 ±1.6 | 20.63 ±0.8 | 22.01 ±0.2 | 22.78 ±2.1 | 24.31 ±1.5 | 20.86 ±1.9 | 28.08 ±1.0        |
| 10      | 25.78 ±0.5 | <b>29.53 ±1.8</b> | 28.12 ±0.9        | 24.56 ±1.0 | 23.61 ±0.9 | 23.47 ±1.8 | 21.38 ±3.2 | 23.94 ±0.7 | 20.43 ±0.5 | 28.78 ±0.9        |
| 15      | 30.42 ±1.1 | 31.57 ±0.8        | 32.01 ±1.1        | 26.39 ±1.5 | 26.01 ±2.1 | 28.47 ±1.5 | 21.98 ±2.5 | 26.73 ±0.8 | 21.62 ±1.3 | <b>35.14 ±0.9</b> |
| 20      | 32.42 ±0.8 | 35.15 ±2.8        | 35.38 ±0.7        | 28.84 ±1.3 | 26.9 ±1.2  | 28.56 ±1.0 | 22.02 ±4.3 | 29.73 ±1.0 | 23.98 ±1.1 | <b>38.35 ±1.7</b> |
| 25      | 34.04 ±0.2 | 35.52 ±1.0        | 36.67 ±1.1        | 31.44 ±1.6 | 27.28 ±1.9 | 29.57 ±1.2 | 25.89 ±3.8 | 30.87 ±1.5 | 25.19 ±1.5 | <b>38.06 ±0.5</b> |
| 30      | 34.83 ±0.4 | 37.61 ±1.9        | 39.05 ±1.1        | 32.18 ±0.4 | 29.12 ±0.8 | 33.19 ±0.4 | 24.93 ±3.9 | 31.13 ±2.8 | 27.36 ±2.1 | <b>42.21 ±0.9</b> |
| 35      | 36.61 ±1.0 | 41.17 ±1.8        | 40.29 ±1.5        | 33.2 ±1.3  | 28.43 ±0.9 | 34.1 ±1.2  | 31.09 ±3.3 | 30.74 ±2.8 | 28.41 ±1.2 | <b>42.98 ±0.7</b> |
| 40      | 38.22 ±0.6 | 40.61 ±1.3        | 42.61 ±1.6        | 32.68 ±0.5 | 30.13 ±1.7 | 34.57 ±0.5 | 29.69 ±3.1 | 30.63 ±3.0 | 28.0 ±1.2  | <b>44.38 ±0.5</b> |
| 45      | 41.05 ±1.2 | 42.42 ±1.0        | 44.02 ±0.7        | 32.85 ±1.3 | 31.22 ±1.0 | 33.62 ±1.2 | 25.86 ±3.2 | 34.7 ±1.3  | 27.03 ±1.8 | <b>47.55 ±1.0</b> |
| 50      | 39.32 ±0.5 | 44.98 ±1.2        | 47.36 ±0.8        | 35.24 ±1.6 | 31.69 ±1.3 | 34.56 ±0.9 | 30.74 ±2.4 | 37.32 ±2.0 | 30.94 ±1.6 | <b>48.26 ±0.8</b> |
| 100     | 50.3 ±0.6  | 51.64 ±1.7        | 56.09 ±1.6        | 39.88 ±1.8 | 36.53 ±1.5 | 41.46 ±1.0 | 39.21 ±3.3 | 41.49 ±1.8 | 36.63 ±1.5 | <b>57.07 ±1.3</b> |

## B.2. CIFAR100 : Comparison with Other Coreset Selection Methods

Table 2. Table corresponding to Figure 5b), Section 4.2 of main text.

| NImPerC | Random     | Cal               | GraphCut          | Glister    | Grand      | Forgetting | Herding    | CRAIG      | Margin     | SLo-Curves        |
|---------|------------|-------------------|-------------------|------------|------------|------------|------------|------------|------------|-------------------|
| 1       | 3.66 ±0.1  | 5.47 ±0.4         | 5.27 ±0.4         | 4.22 ±0.5  | 4.18 ±0.3  | 4.39 ±0.2  | 2.57 ±0.2  | 4.85 ±0.4  | 2.87 ±0.2  | <b>6.03 ±0.1</b>  |
| 2       | 6.01 ±0.2  | 7.59 ±0.4         | 7.06 ±0.3         | 6.27 ±0.6  | 5.5 ±0.4   | 6.13 ±0.3  | 3.42 ±0.3  | 6.81 ±0.5  | 4.06 ±0.4  | <b>7.97 ±0.3</b>  |
| 3       | 6.8 ±0.1   | <b>10.08 ±0.5</b> | 8.79 ±0.3         | 7.51 ±0.2  | 6.81 ±0.3  | 6.8 ±0.3   | 4.07 ±0.3  | 8.31 ±0.5  | 4.31 ±0.5  | 9.44 ±0.2         |
| 4       | 7.96 ±0.4  | 10.17 ±0.5        | 9.51 ±0.5         | 8.26 ±0.5  | 8.14 ±0.6  | 8.04 ±0.6  | 4.59 ±0.6  | 9.04 ±0.7  | 5.53 ±0.5  | <b>10.52 ±0.6</b> |
| 5       | 9.38 ±0.3  | 12.16 ±0.7        | 11.58 ±0.4        | 9.82 ±0.4  | 9.79 ±0.4  | 9.91 ±0.6  | 5.36 ±0.6  | 11.19 ±0.9 | 6.37 ±0.4  | <b>12.7 ±0.3</b>  |
| 10      | 12.74 ±0.4 | 16.37 ±0.6        | 16.62 ±0.2        | 14.58 ±1.1 | 14.21 ±0.8 | 15.27 ±0.8 | 8.29 ±0.8  | 15.11 ±1.0 | 8.64 ±0.7  | <b>17.52 ±0.4</b> |
| 15      | 16.58 ±0.4 | 20.01 ±0.3        | <b>20.43 ±0.7</b> | 17.99 ±0.9 | 17.62 ±0.9 | 17.83 ±0.9 | 9.24 ±0.9  | 18.4 ±0.5  | 10.4 ±0.8  | 20.32 ±0.5        |
| 20      | 19.99 ±0.8 | 22.47 ±1.1        | <b>24.33 ±0.6</b> | 23.08 ±1.3 | 21.84 ±0.7 | 23.34 ±0.5 | 11.57 ±0.5 | 21.17 ±0.1 | 12.71 ±0.5 | 23.97 ±0.5        |
| 25      | 21.82 ±0.4 | 24.03 ±0.7        | <b>26.95 ±0.5</b> | 25.56 ±1.0 | 24.92 ±1.3 | 26.18 ±1.2 | 13.66 ±1.2 | 23.07 ±1.1 | 14.38 ±0.5 | 26.15 ±0.4        |
| 30      | 23.66 ±0.5 | 26.38 ±0.8        | <b>30.75 ±0.6</b> | 29.17 ±0.5 | 27.88 ±1.4 | 28.16 ±1.1 | 15.49 ±1.1 | 24.57 ±0.7 | 17.09 ±0.7 | 26.98 ±0.8        |
| 35      | 28.36 ±0.6 | 27.63 ±0.4        | <b>33.58 ±0.8</b> | 31.24 ±0.8 | 32.13 ±1.2 | 31.95 ±0.8 | 17.2 ±0.8  | 25.5 ±1.2  | 18.85 ±1.5 | 29.82 ±0.4        |
| 40      | 30.75 ±0.8 | 30.68 ±0.7        | <b>34.48 ±0.8</b> | 33.98 ±1.0 | 34.08 ±0.9 | 33.7 ±1.3  | 18.52 ±1.3 | 26.39 ±0.5 | 21.16 ±2.0 | 32.52 ±0.7        |
| 45      | 32.12 ±0.7 | 32.02 ±1.3        | <b>37.08 ±0.4</b> | 36.03 ±0.8 | 35.95 ±0.6 | 36.79 ±0.7 | 19.86 ±0.7 | 28.63 ±1.4 | 23.35 ±1.4 | 33.49 ±0.4        |
| 50      | 32.75 ±1.6 | 34.02 ±0.6        | <b>38.77 ±0.7</b> | 35.0 ±1.0  | 37.84 ±1.0 | 38.03 ±1.0 | 20.54 ±1.0 | 28.28 ±1.0 | 24.97 ±0.7 | 35.7 ±0.5         |

## B.3. Cross Architecture Results for CIFAR-10

Table 3. Table corresponding to Figure 6a), Section 4.3 of main text.

| NImPerC | Random (10%) | ResNet18 (diff seed) (91.8%) | ResNet101 (94.7%) | AlexNet (87.1%) | MobileNetV3 (79%) | DenseNet121 (93.8%) | VGG19 (93.3%) |
|---------|--------------|------------------------------|-------------------|-----------------|-------------------|---------------------|---------------|
| 1       | 14.97 + 1.2  | 18.54 + 1.7                  | 16.49 + 0.5       | 18.82 + 1.4     | 17.1 + 1.0        | 18.0 + 1.1          | 18.14 + 1.1   |
| 2       | 16.6 + 0.7   | 21.45 + 1.1                  | 19.78 + 1.2       | 21.6 + 1.2      | 19.74 + 0.9       | 22.45 + 0.7         | 20.25 + 0.5   |
| 3       | 20.38 + 1.9  | 22.35 + 0.6                  | 23.82 + 0.8       | 23.28 + 0.5     | 22.45 + 1.6       | 22.39 + 1.0         | 22.8 + 1.2    |
| 4       | 19.46 + 0.7  | 23.35 + 1.3                  | 25.23 + 1.4       | 24.35 + 1.2     | 26.28 + 0.8       | 24.59 + 0.9         | 24.62 + 1.1   |
| 5       | 20.17 + 0.6  | 25.69 + 1.7                  | 25.64 + 0.3       | 27.33 + 0.3     | 26.53 + 1.2       | 27.83 + 1.1         | 25.26 + 1.3   |
| 10      | 25.78 + 0.5  | 28.78 + 0.9                  | 31.94 + 0.7       | 30.46 + 0.3     | 29.71 + 0.8       | 30.49 + 1.2         | 28.92 + 0.8   |
| 15      | 30.42 + 1.1  | 35.14 + 0.9                  | 34.24 + 0.5       | 35.82 + 0.8     | 37.09 + 0.2       | 33.75 + 0.7         | 33.83 + 0.5   |
| 20      | 32.42 + 0.8  | 38.35 + 1.7                  | 37.39 + 1.0       | 37.75 + 1.9     | 37.96 + 0.5       | 37.69 + 0.8         | 36.84 + 0.6   |
| 30      | 34.83 + 0.4  | 42.21 + 0.9                  | 43.29 + 0.9       | 43.23 + 0.4     | 45.66 + 0.7       | 40.81 + 2.7         | 40.01 + 0.5   |
| 40      | 38.22 + 0.6  | 44.38 + 0.5                  | 45.98 + 1.2       | 44.29 + 1.0     | 46.95 + 0.5       | 42.81 + 0.7         | 43.8 + 0.4    |
| 50      | 39.32 + 0.5  | 48.26 + 0.8                  | 48.35 + 0.6       | 46.58 + 1.7     | 50.32 + 0.8       | 45.87 + 0.6         | 46.01 + 1.3   |
| 100     | 50.3 + 0.6   | 57.07 + 1.3                  | 57.05 + 0.6       | 55.34 + 0.2     | 55.55 + 0.5       | 53.85 + 0.3         | 55.69 + 0.8   |

### B.4. Ablation Study for Regularization for ResNet18, trained on CIFAR-10

Table 4. Table corresponding to Figure 6a), Section 4.4 of main text.

| NImPerC | Random Selection | SLo-Curves Selection without regularization | SLo-Curves Selection with best regularization |
|---------|------------------|---------------------------------------------|-----------------------------------------------|
| 1       | 14.97 + 1.2      | 16.27 + 1.0                                 | 18.54 + 1.7                                   |
| 2       | 16.6 + 0.7       | 18.85 + 0.7                                 | 21.45 + 1.1                                   |
| 3       | 20.38 + 1.9      | 19.14 + 0.8                                 | 22.35 + 0.6                                   |
| 4       | 19.46 + 0.7      | 19.71 + 1.0                                 | 23.35 + 1.3                                   |
| 5       | 20.17 + 0.6      | 24.49 + 0.9                                 | 25.69 + 1.7                                   |
| 6       | 22.94 + 1.0      | 22.73 + 1.1                                 | 25.86 + 0.3                                   |
| 7       | 26.31 + 1.0      | 24.07 + 0.8                                 | 27.01 + 1.2                                   |
| 8       | 23.8 + 0.7       | 23.76 + 0.5                                 | 28.58 + 1.3                                   |
| 9       | 23.88 + 0.5      | 27.65 + 1.4                                 | 28.08 + 1.0                                   |
| 10      | 25.78 + 0.5      | 26.75 + 0.9                                 | 28.78 + 0.9                                   |
| 15      | 30.42 + 1.1      | 32.19 + 0.6                                 | 35.14 + 0.9                                   |
| 20      | 32.42 + 0.8      | 34.13 + 1.2                                 | 38.35 + 1.7                                   |
| 25      | 34.04 + 0.2      | 35.04 + 1.0                                 | 38.06 + 0.5                                   |
| 30      | 34.83 + 0.4      | 37.36 + 0.8                                 | 42.21 + 0.9                                   |
| 35      | 36.61 + 1.0      | 41.99 + 0.4                                 | 42.98 + 0.7                                   |
| 40      | 38.22 + 0.6      | 40.97 + 0.5                                 | 44.38 + 0.5                                   |
| 45      | 41.05 + 1.2      | 44.6 + 0.6                                  | 47.55 + 1.0                                   |
| 50      | 39.32 + 0.5      | 45.37 + 1.2                                 | 48.26 + 0.8                                   |
| 100     | 50.3 + 0.6       | 54.84 + 0.6                                 | 57.07 + 1.3                                   |

### B.5. Early Emergence of Low Curvature Samples, for DenseNet121 trained on CIFAR-10

Table 5. Table corresponding to Figure 7b), Section 4.5 of main text.

| NImPerC | Random (10%) | DenseNet RandomInit (10%) | DenseNet Epoch 10 (84.7%) | DenseNet Converged (93.8%) |
|---------|--------------|---------------------------|---------------------------|----------------------------|
| 1       | 14.97 + 1.2  | 16.71 + 1.6               | 16.49 + 0.5               | 18.0 + 1.1                 |
| 2       | 16.6 + 0.7   | 18.27 + 0.5               | 19.78 + 1.2               | 22.45 + 0.7                |
| 3       | 20.38 + 1.9  | 19.96 + 0.8               | 23.82 + 0.8               | 22.39 + 1.0                |
| 4       | 19.46 + 0.7  | 20.45 + 0.4               | 25.23 + 1.4               | 24.59 + 0.9                |
| 5       | 20.17 + 0.6  | 22.31 + 0.4               | 25.64 + 0.3               | 27.83 + 1.1                |
| 10      | 25.78 + 0.5  | 23.21 + 1.1               | 31.94 + 0.7               | 30.49 + 1.2                |
| 15      | 30.42 + 1.1  | 25.48 + 0.3               | 34.24 + 0.5               | 33.75 + 0.7                |
| 20      | 32.42 + 0.8  | 26.88 + 0.9               | 37.39 + 1.0               | 37.69 + 0.8                |
| 30      | 34.83 + 0.4  | 29.46 + 1.0               | 41.34 + 1.3               | 40.81 + 2.7                |
| 40      | 38.22 + 0.6  | 30.38 + 0.9               | 43.25 + 0.9               | 42.81 + 0.7                |
| 50      | 39.32 + 0.5  | 33.94 + 0.4               | 45.71 + 0.3               | 45.87 + 0.6                |
| 100     | 50.3 + 0.6   | 41.51 + 0.8               | 54.8 + 1.0                | 53.85 + 0.3                |
